# Supplementary material
Source: PubMed Central journal article supplement (PMC6062786)
Supplement: JCM.00395-18_zjm999096019s1.pdf [file JCM.00395-18_zjm999096019s1.pdf]

**Supplementary Table S1. Main characteristics of 342 carbapenem-resistant *Enterobacteriaceae* used in this study.**

| No. | Species                      | Spe | ST  | beta-lactamase genes |       |        |                  |       | MHT | Carba NP | MH A |     | mCIM |     |     |
|-----|------------------------------|-----|-----|----------------------|-------|--------|------------------|-------|-----|----------|------|-----|------|-----|-----|
|     |                              |     |     | Carbapenem ase       | TEM   | SHV    | CTX-M            | AmpC  |     |          | 1 h  | 2 h | MEM  | IPM | ETP |
| D01 | <i>Enterobacter cloacae</i>  | bl  | -   | -                    | -     | -      | -                | -     | w + | -        | -    | -   | +    | +   | +   |
| D02 | <i>Enterobacter cloacae</i>  | bl  | -   | -                    | TEM-1 | -      | -                | -     | w + | -        | -    | -   | -    | -   | -   |
| D03 | <i>Escherichia coli</i>      | bl  | 354 | KPC-2                | TEM-1 | -      | -                | CMY-2 | +   | +        | +    | +   | +    | +   | +   |
| D04 | <i>Klebsiella pneumoniae</i> | bl  | 11  | KPC-2                | TEM-1 | SHV-11 | CTX-M-14         | CMY-2 | +   | +        | -    | +   | +    | +   | +   |
| D06 | <i>Klebsiella pneumoniae</i> | bl  | 11  | KPC-2                | TEM-1 | SHV-11 | CTX-M-14         | CMY-2 | +   | +        | -    | +   | +    | +   | +   |
| D07 | <i>Klebsiella pneumoniae</i> | bl  | 69  | KPC-2                | TEM-1 | -      | CTX-M-14         | CMY-2 | +   | +        | +    | +   | +    | +   | +   |
| D09 | <i>Klebsiella pneumoniae</i> | bl  | 11  | KPC-2                | TEM-1 | SHV-11 | CTX-M-14         | CMY-2 | +   | +        | -    | +   | +    | +   | +   |
| D11 | <i>Citrobacter freundii</i>  | df  | -   | IMP-1                | -     | -      | CTX-M-3,CTX-M-14 | CMY-2 | +   | +        | +    | +   | +    | +   | +   |
| D13 | <i>Escherichia coli</i>      | af  | -   | -                    | -     | -      | CTX-M-3          | -     | -   | -        | -    | -   | -    | -   | -   |
| D16 | <i>Klebsiella pneumoniae</i> | bl  | 14  | KPC-2                | TEM-1 | SHV-11 | CTX-M-3,CTX-M-14 | -     | +   | +        | +    | +   | +    | +   | +   |
| D17 | <i>Klebsiella pneumoniae</i> | df  | 11  | KPC-2                | -     | SHV-11 | -                | -     | +   | +        | +    | +   | +    | +   | +   |
| D18 | <i>Klebsiella pneumoniae</i> | bl  | 147 | KPC-2                | TEM-1 | SHV-11 | CTX-M-3          | -     | +   | +        | +    | +   | +    | +   | +   |

|     |                              |    |     |       |       |        |                   |       |   |    |   |   |   |   |   |
|-----|------------------------------|----|-----|-------|-------|--------|-------------------|-------|---|----|---|---|---|---|---|
| D21 | <i>Escherichia coli</i>      | bl | 648 | KPC-2 | TEM-1 | -      | CTX-M-3, CTX-M-14 | -     | + | -  | + | + | + | + | + |
| D22 | <i>Klebsiella pneumoniae</i> | bl | 11  | KPC-2 | TEM-1 | SHV-11 | -                 | -     | + | +  | - | + | + | + | + |
| D23 | <i>Klebsiella pneumoniae</i> | af | -   | -     | -     | SHV-12 | CTX-M-14          | DHA-1 | - | -  | - | - | - | - | - |
| D24 | <i>Enterobacter cloacae</i>  | df | -   | -     | TEM-1 | -      | -                 | -     | - | -  | - | - | - | - | - |
| D25 | <i>Enterobacter cloacae</i>  | df | -   | NDM-1 | -     | -      | -                 | -     | + | w+ | + | + | + | + | - |
| D26 | <i>Klebsiella pneumoniae</i> | sp | 11  | KPC-2 | -     | SHV-1  | CTX-M-14          | CMY-2 | + | +  | + | + | + | + | + |
| D27 | <i>Klebsiella pneumoniae</i> | bi | 11  | KPC-2 | -     | SHV-11 | CTX-M-14          | CMY-2 | + | +  | - | + | + | + | + |
| D28 | <i>Klebsiella pneumoniae</i> | ur | 11  | KPC-2 | -     | SHV-11 | -                 | CMY-2 | + | +  | - | + | + | + | + |
| D29 | <i>Escherichia coli</i>      | ur | 354 | IMP-1 | TEM-1 | -      | CTX-M-15          | -     | + | +  | + | + | + | + | + |
| D30 | <i>Klebsiella pneumoniae</i> | bl | 11  | KPC-2 | TEM-1 | SHV-11 | CTX-M-14          | CMY-2 | + | +  | - | + | + | + | + |
| D32 | <i>Escherichia coli</i>      | df | -   | -     | TEM-1 | -      | CTX-M-14          | -     | - | -  | - | - | - | - | - |
| D33 | <i>Klebsiella pneumoniae</i> | ur | 11  | KPC-2 | TEM-1 | SHV-11 | CTX-M-14          | CMY-2 | + | +  | - | + | + | + | + |
| D34 | <i>Klebsiella pneumoniae</i> | sp | 11  | KPC-2 | TEM-1 | SHV-11 | CTX-M-14          | CMY-2 | + | +  | - | + | + | + | + |
| D35 | <i>Klebsiella pneumoniae</i> | ur | 11  | KPC-2 | TEM-1 | SHV-11 | CTX-M-14          | CMY-2 | + | +  | - | + | + | + | + |
| D36 | <i>Enterobacter cloacae</i>  | sp | -   | IMP-1 | -     | SHV-11 | -                 | -     | + | +  | + | + | + | + | + |

|     |                               |    |    |       |       |        |                  |       |     |   |   |   |   |   |   |
|-----|-------------------------------|----|----|-------|-------|--------|------------------|-------|-----|---|---|---|---|---|---|
| D37 | <i>Citrobacter freundii</i>   | ur | -  | IMP-1 | -     | -      | CTX-M-3,CTX-M-14 | CMY-2 | +   | + | + | + | + | + | + |
| D38 | <i>Klebsiella oxytoca</i>     | rs | -  | IMP-1 | -     | -      | -                | CMY-2 | +   | + | + | + | + | + | + |
| D39 | <i>Klebsiella planticola</i>  | bl | -  | -     | -     | SHV-11 | CTX-M-14         | -     | -   | - | - | - | - | - | - |
| D40 | <i>Enterobacter cloacae</i>   | bl | -  | IMP-4 | TEM-1 | -      | -                | -     | w + | + | + | + | + | + | + |
| D41 | <i>Enterobacter aerogenes</i> | sp | -  | -     | -     | -      | -                | -     | -   | - | - | - | - | - | - |
| D42 | <i>Klebsiella pneumoniae</i>  | ot | 11 | KPC-2 | -     | SHV-11 | -                | CMY-2 | +   | + | - | + | + | + | + |
| D43 | <i>Klebsiella pneumoniae</i>  | ti | 11 | KPC-2 | -     | SHV-11 | CTX-M-14         | -     | +   | + | + | + | + | + | + |
| D44 | <i>Klebsiella pneumoniae</i>  | sp | 11 | KPC-2 | -     | SHV-11 | CTX-M-14         | -     | +   | + | + | + | + | + | + |
| D45 | <i>Klebsiella pneumoniae</i>  | bl | 14 | KPC-2 | -     | SHV-11 | CTX-M-3,CTX-M-14 | -     | +   | + | + | + | + | + | + |
| D47 | <i>Citrobacter freundii</i>   | sp | -  | IMP-1 | -     | SHV-11 | -                | CMY-2 | w + | + | + | + | + | + | + |
| D48 | <i>Enterobacter aerogenes</i> | sp | -  | -     | -     | -      | -                | DHA-1 | -   | - | - | - | - | - | - |
| D49 | <i>Enterobacter cloacae</i>   | pe | 97 | KPC-2 | -     | -      | -                | CMY-2 | +   | + | + | + | + | + | + |
| D50 | <i>Klebsiella pneumoniae</i>  | ws | 11 | KPC-2 | -     | SHV-11 | CTX-M-14         | -     | +   | + | - | + | + | + | + |
| D51 | <i>Klebsiella pneumoniae</i>  | df | 11 | KPC-2 | -     | SHV-11 | -                | -     | +   | + | - | + | + | + | + |
| D52 | <i>Klebsiella pneumoniae</i>  | sp | 65 | KPC-2 | TEM-1 | SHV-11 | CTX-M-3          | -     | +   | + | + | + | + | + | + |



|     |                               |    |          |             |       |        |                  |       |   |   |   |   |   |   |   |
|-----|-------------------------------|----|----------|-------------|-------|--------|------------------|-------|---|---|---|---|---|---|---|
| H13 | <i>Klebsiella pneumoniae</i>  | ti | 11       | KPC-2       | TEM-1 | SHV-12 | CTX-M-14         | -     | + | + | - | + | + | + | + |
| H17 | <i>Klebsiella pneumoniae</i>  | af | 11       | KPC-2       | -     | SHV-11 | CTX-M-14         | -     | + | + | - | + | + | + | + |
| H18 | <i>Enterobacter aerogenes</i> | af | -        | -           | -     | -      | -                | -     | - | - | - | - | - | - | - |
| H19 | <i>Escherichia coli</i>       | ur | 410      | KPC-2       | -     | -      | -                | -     | + | + | + | + | + | + | + |
| H20 | <i>Klebsiella pneumoniae</i>  | ur | 11       | KPC-2       | TEM-1 | SHV-11 | CTX-M-14         | -     | + | + | - | + | + | + | + |
| H22 | <i>Klebsiella pneumoniae</i>  | ur | 11       | KPC-2       | TEM-1 | SHV-11 | CTX-M-14         | -     | + | + | - | + | + | + | + |
| H23 | <i>Klebsiella pneumoniae</i>  | ur | 11       | KPC-2       | TEM-1 | SHV-11 | CTX-M-14         | -     | + | + | - | + | + | + | + |
| H24 | <i>Escherichia coli</i>       | ti | -        | -           | TEM-1 | SHV-1a | CTX-M-3,CTX-M-14 | DHA-1 | - | - | - | - | - | - | - |
| H26 | <i>Escherichia coli</i>       | ti | 167      | KPC-2       | -     | -      | CTX-M-14         | -     | + | + | + | + | + | + | + |
| H27 | <i>Klebsiella pneumoniae</i>  | ab | 169<br>7 | IMP-26 like | -     | -      | CTX-M-3          | DHA-1 | + | + | + | + | + | + | + |
| H28 | <i>Enterobacter aerogenes</i> | ab | -        | -           | -     | -      | CTX-M-3,CTX-M-14 | -     | - | - | - | - | - | - | - |
| H29 | <i>Klebsiella pneumoniae</i>  | ur | -        | -           | TEM-1 | SHV-1  | CTX-M-3,CTX-M-14 | DHA-1 | - | - | - | - | - | - | - |
| H30 | <i>Klebsiella pneumoniae</i>  | ur | 48       | IMP         | TEM-1 | SHV-11 | CTX-M-14         | -     | + | + | + | + | + | + | + |
| H31 | <i>Klebsiella pneumoniae</i>  | ur | 48       | IMP-8 like  | TEM-1 | SHV-11 | CTX-M-14         | -     | + | + | + | + | + | + | + |
| H32 | <i>Klebsiella pneumoniae</i>  | af | 11       | KPC-2       | TEM-1 | SHV-11 | CTX-M-14         | -     | + | + | + | + | + | + | + |

|     |                               |    |     |            |       |        |                  |       |     |   |   |   |   |   |
|-----|-------------------------------|----|-----|------------|-------|--------|------------------|-------|-----|---|---|---|---|---|
| H33 | <i>Enterobacter cloacae</i>   | ur | -   | -          | TEM-1 | -      | CTX-M-14         | -     | -   | - | - | - | - | - |
| H34 | <i>Klebsiella planticola</i>  | ur | -   | IMP-4      | TEM-1 | SHV-11 | CTX-M-3          | -     | +   | + | + | + | + | + |
| H35 | <i>Escherichia coli</i>       | ur | 617 | KPC-2      | -     | -      | CTX-M-14         | -     | +   | + | + | + | + | + |
| H36 | <i>Escherichia coli</i>       | ur | 354 | KPC-2      | TEM-1 | -      | CTX-M-3,CTX-M-14 | -     | +   | + | + | + | + | + |
| H44 | <i>Klebsiella pneumoniae</i>  | ur | -   | -          | -     | SHV-1a | CTX-M-14         | DHA-1 | -   | - | - | - | - | - |
| H45 | <i>Klebsiella pneumoniae</i>  | bi | -   | -          | -     | SHV-1a | CTX-M-14         | -     | -   | - | - | - | - | - |
| H46 | <i>Enterobacter aerogenes</i> | bi | -   | -          | -     | -      | -                | -     | -   | - | - | - | - | - |
| H48 | <i>Enterobacter cloacae</i>   | bi | -   | -          | -     | -      | -                | -     | -   | - | - | - | - | - |
| H50 | <i>Klebsiella pneumoniae</i>  | af | -   | -          | -     | SHV-11 | CTX-M-14         | DHA-1 | -   | - | - | - | - | - |
| H53 | <i>Serratia marcescens</i>    | ab | -   | IMP        | -     | -      | -                | -     | w + | + | + | + | + | + |
| H54 | <i>Klebsiella oxytoca</i>     | ab | -   | IMP-4 like | -     | -      | CTX-M-3          | -     | +   | + | + | + | + | + |
| H55 | <i>Enterobacter aerogenes</i> | ab | -   | KPC-2      | TEM-1 | -      | -                | -     | +   | + | + | + | + | + |
| H57 | <i>Klebsiella pneumoniae</i>  | ti | 37  | KPC-2      | TEM-1 | SHV-1  | CTX-M-14         | -     | +   | + | + | + | + | + |
| H61 | <i>Klebsiella pneumoniae</i>  | af | 11  | KPC-2      | -     | SHV-11 | -                | -     | +   | + | - | + | + | + |
| H62 | <i>Citrobacter freundii</i>   | af | -   | IMP-1      | -     | -      | CTX-M-3,CTX-M-14 | CMY-2 | +   | + | - | + | + | + |
| H67 | <i>Escherichia coli</i>       | ti | -   | -          | -     | -      | CTX-M-14         | -     | -   | - | - | - | - | - |

|     |                              |    |          |       |       |        |                  |       |   |   |   |   |   |   |   |
|-----|------------------------------|----|----------|-------|-------|--------|------------------|-------|---|---|---|---|---|---|---|
| H68 | <i>Klebsiella pneumoniae</i> | ti | -        | -     | -     | SHV-5  | CTX-M-14         | -     | - | - | - | - | - | - | - |
| H69 | <i>Serratia marcescens</i>   | bi | -        | -     | -     | -      | -                | -     | - | - | - | - | - | - | - |
| H71 | <i>Enterobacter cloacae</i>  | ur | -        | -     | -     | SHV-11 | -                | -     | - | - | - | - | - | - | - |
| H73 | <i>Klebsiella pneumoniae</i> | ab | 11       | KPC-2 | TEM-1 | SHV-11 | CTX-M-14         | -     | + | + | - | + | + | + | + |
| H74 | <i>Klebsiella pneumoniae</i> | ti | 11       | KPC-2 | TEM-1 | SHV-12 | CTX-M-14         | -     | + | + | - | + | + | + | + |
| H75 | <i>Escherichia coli</i>      | ab | 200<br>3 | KPC-2 | -     | -      | CTX-M-15         | CMY-2 | + | + | + | + | + | + | + |
| H78 | <i>Escherichia coli</i>      | af | 131      | KPC-2 | TEM-1 | -      | CTX-M-3,CTX-M-14 | -     | + | + | + | + | + | + | + |
| H79 | <i>Klebsiella pneumoniae</i> | af | 15       | KPC-2 | TEM-1 | SHV-11 | -                | -     | + | + | + | + | + | + | + |
| H80 | <i>Escherichia coli</i>      | af | 131      | KPC-2 | TEM-1 | -      | CTX-M-3,CTX-M-14 | -     | + | + | + | + | + | + | + |
| H81 | <i>Klebsiella pneumoniae</i> | ab | 37       | KPC-2 | -     | SHV-11 | CTX-M-14         | -     | + | + | + | + | + | + | + |
| H82 | <i>Klebsiella pneumoniae</i> | ab | 290      | KPC-2 | -     | SHV-11 | CTX-M-14         | DHA-1 | + | + | + | + | + | + | + |
| H83 | <i>Klebsiella pneumoniae</i> | ab | 11       | KPC-2 | -     | SHV-11 | CTX-M-14         | -     | + | + | + | + | + | + | + |
| H85 | <i>Escherichia coli</i>      | ab | 200<br>3 | KPC-2 | -     | -      | CTX-M-3          | CMY-2 | + | + | + | + | + | + | + |
| H86 | <i>Serratia marcescens</i>   | ab | -        | KPC-2 | -     | -      | -                | -     | + | + | + | + | + | + | + |
| H87 | <i>Klebsiella pneumoniae</i> | ab | 290      | KPC-2 | -     | SHV-11 | CTX-M-14         | -     | + | + | + | + | + | + | + |
| H88 | <i>Klebsiella pneumoniae</i> | bi | 11       | KPC-2 | TEM-1 | SHV-11 | CTX-M-14         | DHA-1 | + | + | - | + | + | + | + |

|          |                              |    |          |       |       |        |                  |       |     |   |   |   |   |   |   |
|----------|------------------------------|----|----------|-------|-------|--------|------------------|-------|-----|---|---|---|---|---|---|
| H89      | <i>Escherichia coli</i>      | ab | 200<br>3 | KPC-2 | -     | -      | CTX-M-3          | CMY-2 | +   | + | + | + | + | + | + |
| H90      | <i>Serratia marcescens</i>   | ab | -        | KPC-2 | TEM-1 | SHV-11 | CTX-M-14         | -     | +   | + | - | + | + | + | + |
| H91      | <i>Escherichia coli</i>      | pe | 648      | KPC-2 | TEM-1 | -      | CTX-M-3,CTX-M-14 | -     | +   | + | + | + | + | + | + |
| H92      | <i>Escherichia coli</i>      | ab | 354      | KPC-2 | -     | -      | CTX-M-3,CTX-M-14 | CMY-2 | +   | + | + | + | + | + | + |
| H93      | <i>Escherichia coli</i>      | bi | 410      | KPC-2 | TEM-1 | -      | -                | -     | +   | + | + | + | + | + | + |
| H95      | <i>Klebsiella pneumoniae</i> | ab | 290      | KPC-2 | -     | SHV-11 | CTX-M-14         | DHA-1 | +   | + | + | + | + | + | + |
| H96      | <i>Escherichia coli</i>      | ab | 354      | KPC-2 | -     | -      | CTX-M-14         | CMY-2 | +   | + | + | + | + | + | + |
| H97      | <i>Klebsiella pneumoniae</i> | ab | 15       | KPC-2 | TEM-1 | SHV-11 | -                | -     | +   | + | + | + | + | + | + |
| H98      | <i>Klebsiella pneumoniae</i> | ab | 11       | KPC-2 | TEM-1 | SHV-11 | CTX-M-14         | -     | +   | + | - | + | + | + | + |
| L00<br>1 | <i>Klebsiella pneumoniae</i> | sp | 1        | NDM-1 | TEM-1 | SHV-11 | -                | -     | -   | + | + | + | + | + | + |
| L00<br>2 | <i>Enterobacter cloacae</i>  | ws | -        | NDM-1 | TEM-1 | SHV-11 | CTX-M-3          | DHA-1 | +   | + | + | + | + | + | + |
| L00<br>3 | <i>Klebsiella pneumoniae</i> | sp | 25       | NDM-1 | -     | SHV-11 | -                | -     | -   | + | + | + | + | + | + |
| L00<br>4 | <i>Klebsiella pneumoniae</i> | sp | 25       | NDM-1 | -     | SHV-11 | -                | -     | -   | + | + | + | + | + | + |
| L00<br>5 | <i>Enterobacter cloacae</i>  | ca | -        | NDM-1 | -     | SHV-11 | CTX-M-14         | CMY-2 | w + | + | + | + | + | + | + |
| L00<br>6 | <i>Enterobacter cloacae</i>  | sp | -        | NDM-1 | TEM-1 | SHV-11 | CTX-M-3          | DHA-1 | w + | + | + | + | + | + | + |



|      |                              |    |    |             |       |        |          |       |    |    |   |   |   |   |   |
|------|------------------------------|----|----|-------------|-------|--------|----------|-------|----|----|---|---|---|---|---|
| L007 | <i>Enterobacter cloacae</i>  | sp | -  | IMP-26 like | -     | -      | CTX-M-3  | -     | +  | +  | + | + | + | + | + |
| L008 | <i>Enterobacter cloacae</i>  | bl | -  | NDM-1       | -     | SHV-11 | -        | DHA-1 | +  | +  | + | + | + | + | + |
| L009 | <i>Enterobacter cloacae</i>  | sp | -  | NDM-1       | TEM-1 | SHV-11 | -        | DHA-1 | -  | w+ | + | + | + | + | + |
| L010 | <i>Enterobacter cloacae</i>  | sp | -  | NDM-1       | TEM-1 | SHV-11 | CTX-M-3  | DHA-1 | w+ | +  | + | + | + | + | + |
| L011 | <i>Enterobacter cloacae</i>  | bl | -  | NDM-1       | TEM-1 | SHV-11 | CTX-M-3  | -     | w+ | +  | + | + | + | + | + |
| L012 | <i>Klebsiella oxytoca</i>    | bl | -  | NDM-1       | -     | SHV-11 | CTX-M-14 | -     | -  | +  | + | + | + | + | + |
| L013 | <i>Klebsiella pneumoniae</i> | bi | 11 | NDM-1       | TEM-1 | SHV-11 | -        | -     | -  | +  | + | + | + | + | + |
| L014 | <i>Klebsiella pneumoniae</i> | sp | 11 | NDM-1       | TEM-1 | SHV-11 | -        | -     | -  | +  | + | + | + | + | + |
| L015 | <i>Enterobacter cloacae</i>  | bl | -  | NDM-1       | -     | SHV-11 | -        | DHA-1 | -  | +  | + | + | + | + | + |
| L016 | <i>Enterobacter cloacae</i>  | ws | -  | NDM-1       | -     | SHV-11 | -        | DHA-1 | w+ | +  | + | + | + | + | + |
| L017 | <i>Enterobacter cloacae</i>  | ca | -  | -           | TEM-1 | -      | CTX-M-3  | -     | -  | -  | - | - | - | - | - |
| L018 | <i>Enterobacter cloacae</i>  | bl | -  | -           | -     | -      | CTX-M-3  | DHA-1 | -  | -  | - | - | - | - | - |
| L019 | <i>Enterobacter cloacae</i>  | sf | -  | -           | -     | -      | CTX-M-3  | DHA-1 | -  | -  | - | - | - | - | - |
| L021 | <i>Enterobacter cloacae</i>  | ca | -  | -           | TEM-1 | -      | CTX-M-3  | -     | -  | -  | - | - | - | - | - |
| L024 | <i>Enterobacter cloacae</i>  | ab | -  | -           | -     | -      | -        | -     | -  | -  | - | - | - | - | - |
| L025 | <i>Enterobacter cloacae</i>  | ti | -  | -           | TEM-1 | -      | CTX-M-14 | DHA-1 | -  | -  | - | - | - | - | - |



|          |                              |    |     |       |       |        |                  |       |    |    |   |   |   |   |
|----------|------------------------------|----|-----|-------|-------|--------|------------------|-------|----|----|---|---|---|---|
| L04<br>7 | <i>Klebsiella pneumoniae</i> | ur | -   | -     | -     | SHV-11 | -                | DHA-1 | -  | -  | - | - | - | - |
| L04<br>8 | <i>Klebsiella pneumoniae</i> | sp | 655 | KPC-2 | TEM-1 | SHV-11 | CTX-M-3          | -     | +  | +  | + | + | + | + |
| L04<br>9 | <i>Klebsiella pneumoniae</i> | af | 15  | KPC-2 | TEM-1 | SHV-11 | CTX-M-3,CTX-M-14 | DHA-1 | +  | w+ | + | + | + | + |
| L05<br>0 | <i>Klebsiella pneumoniae</i> | bl | -   | -     | TEM-1 | SHV-11 | -                | DHA-1 | -  | -  | - | - | - | - |
| L05<br>1 | <i>Klebsiella pneumoniae</i> | ur | 11  | KPC-2 | TEM-1 | SHV-11 | CTX-M-3,CTX-M-14 | CMY-2 | +  | +  | - | + | + | + |
| L05<br>2 | <i>Klebsiella pneumoniae</i> | ur | 22  | KPC-2 | TEM-1 | SHV-11 | CTX-M-14         | -     | +  | +  | + | + | + | + |
| L05<br>3 | <i>Escherichia coli</i>      | bl | 167 | KPC-2 | TEM-1 | -      | CTX-M-14         | -     | w+ | +  | + | + | + | + |
| L05<br>4 | <i>Escherichia coli</i>      | ur | 167 | KPC-2 | TEM-1 | -      | CTX-M-3          | -     | +  | +  | + | + | + | + |
| L05<br>5 | <i>Escherichia coli</i>      | bl | -   | -     | -     | -      | -                | CMY-2 | -  | -  | - | - | - | - |
| L05<br>6 | <i>Serratia marcescens</i>   | sp | -   | KPC-2 | -     | -      | -                | DHA-1 | +  | +  | + | + | + | + |
| L05<br>7 | <i>Klebsiella pneumoniae</i> | fe | 11  | KPC-2 | TEM-1 | SHV-11 | CTX-M-14         | DHA-1 | +  | +  | - | + | + | + |
| L05<br>8 | <i>Klebsiella pneumoniae</i> | sf | 11  | KPC-2 | TEM-1 | SHV-11 | CTX-M-3          | -     | +  | +  | - | + | + | + |
| L05<br>9 | <i>Klebsiella pneumoniae</i> | ur | 11  | KPC-2 | -     | SHV-11 | -                | DHA-1 | +  | +  | + | + | + | + |
| L06<br>0 | <i>Klebsiella pneumoniae</i> | sp | 412 | KPC-2 | -     | SHV-11 | -                | DHA-1 | +  | +  | + | + | + | + |
| L06<br>1 | <i>Klebsiella pneumoniae</i> | bi | 11  | KPC-2 | TEM-1 | SHV-11 | CTX-M-14         | -     | +  | +  | + | + | + | + |

|          |                              |    |          |       |       |        |          |       |     |   |   |   |   |   |
|----------|------------------------------|----|----------|-------|-------|--------|----------|-------|-----|---|---|---|---|---|
| L06<br>2 | <i>Klebsiella pneumoniae</i> | sp | 11       | KPC-2 | TEM-1 | SHV-11 | CTX-M-14 | -     | +   | + | + | + | + | + |
| L06<br>3 | <i>Klebsiella pneumoniae</i> | bl | 11       | KPC-2 | TEM-1 | SHV-11 | CTX-M-14 | -     | +   | + | - | + | + | + |
| L06<br>4 | <i>Klebsiella pneumoniae</i> | bl | 11       | KPC-2 | TEM-1 | SHV-11 | CTX-M-14 | -     | +   | + | - | + | + | + |
| L06<br>5 | <i>Klebsiella pneumoniae</i> | bl | 11       | KPC-2 | -     | SHV-11 | -        | -     | +   | + | + | + | + | + |
| L06<br>6 | <i>Klebsiella pneumoniae</i> | sp | 11       | KPC-2 | -     | SHV-11 | -        | DHA-1 | +   | + | + | + | + | + |
| L06<br>7 | <i>Klebsiella pneumoniae</i> | fe | 257<br>0 | KPC-2 | TEM-1 | SHV-11 | CTX-M-3  | -     | +   | + | + | + | + | + |
| L06<br>8 | <i>Proteus mirabilis</i>     | ur | -        | KPC-2 | TEM-1 | -      | -        | -     | +   | + | + | + | + | + |
| L06<br>9 | <i>Klebsiella pneumoniae</i> | sp | 11       | KPC-2 | -     | SHV-11 | -        | -     | +   | + | - | + | + | + |
| L07<br>0 | <i>Klebsiella pneumoniae</i> | bl | 48       | KPC-2 | TEM-1 | SHV-11 | CTX-M-3  | -     | w + | + | + | + | + | + |
| L07<br>1 | <i>Klebsiella pneumoniae</i> | sp | 11       | KPC-2 | TEM-1 | SHV-11 | -        | -     | +   | + | + | + | + | + |
| L07<br>2 | <i>Klebsiella pneumoniae</i> | bi | 11       | KPC-2 | TEM-1 | SHV-11 | CTX-M-14 | DHA-1 | +   | + | - | + | + | + |
| L07<br>3 | <i>Klebsiella pneumoniae</i> | bi | 11       | KPC-2 | TEM-1 | SHV-11 | CTX-M-3  | -     | +   | + | + | + | + | + |
| L07<br>4 | <i>Klebsiella pneumoniae</i> | ab | 11       | KPC-2 | TEM-1 | SHV-11 | CTX-M-14 | -     | +   | + | + | + | + | + |
| L07<br>5 | <i>Klebsiella pneumoniae</i> | df | 11       | KPC-2 | TEM-1 | SHV-11 | CTX-M-14 | -     | +   | + | - | + | + | + |
| L07<br>7 | <i>Klebsiella pneumoniae</i> | ur | 11       | KPC-2 | -     | SHV-11 | -        | -     | +   | + | + | + | + | + |
| L07<br>8 | <i>Klebsiella pneumoniae</i> | ur | 11       | KPC-2 | TEM-1 | SHV-11 | CTX-M-14 | -     | +   | + | + | + | + | + |

|          |                               |          |     |       |       |        |                  |       |     |   |   |   |   |   |   |
|----------|-------------------------------|----------|-----|-------|-------|--------|------------------|-------|-----|---|---|---|---|---|---|
| L07<br>9 | <i>Klebsiella pneumoniae</i>  | df       | 11  | KPC-2 | -     | SHV-11 | -                | -     | +   | + | - | + | + | + | + |
| L08<br>0 | <i>Klebsiella pneumoniae</i>  | bi       | 11  | KPC-2 | TEM-1 | SHV-11 | CTX-M-14         | -     | +   | + | - | + | + | + | + |
| L08<br>1 | <i>Enterobacter aerogenes</i> | gf       | -   | -     | -     | -      | CTX-M-14         | -     | -   | - | - | - | - | - | - |
| L08<br>2 | <i>Klebsiella pneumoniae</i>  | df       | 11  | KPC-2 | TEM-1 | SHV-11 | CTX-M-14         | -     | +   | + | + | + | + | + | + |
| L08<br>3 | <i>Klebsiella pneumoniae</i>  | ur       | 11  | KPC-2 | TEM-1 | SHV-11 | CTX-M-14         | -     | +   | + | - | + | + | + | + |
| L08<br>4 | <i>Enterobacter cloacae</i>   | bl       | -   | NDM-1 | -     | -      | CTX-M-14         | -     | +   | + | + | + | + | + | + |
| L08<br>5 | <i>Enterobacter cloacae</i>   | bl       | -   | NDM-1 | TEM-1 | SHV-11 | CTX-M-3          | -     | +   | + | + | + | + | + | + |
| L08<br>6 | <i>Enterobacter cloacae</i>   | BAL<br>F | -   | NDM-1 | TEM-1 | SHV-11 | CTX-M-3          | -     | w + | + | + | + | + | - | - |
| L08<br>7 | <i>Enterobacter cloacae</i>   | bl       | -   | NDM-1 | TEM-1 | SHV-11 | CTX-M-3          | -     | +   | + | + | + | - | - | - |
| L08<br>8 | <i>Enterobacter cloacae</i>   | ur       | -   | -     | -     | -      | CTX-M-3,CTX-M-14 | -     | -   | - | - | - | - | - | - |
| L08<br>9 | <i>Enterobacter cloacae</i>   | bl       | -   | -     | -     | SHV-11 | CTX-M-14         | -     | -   | - | - | - | - | - | - |
| L09<br>0 | <i>Klebsiella pneumoniae</i>  | ur       | 656 | KPC-2 | -     | -      | -                | -     | +   | + | + | + | + | + | + |
| L09<br>1 | <i>Klebsiella pneumoniae</i>  | ur       | -   | -     | -     | SHV-11 | -                | DHA-1 | -   | - | - | - | - | - | - |
| L09<br>3 | <i>Klebsiella pneumoniae</i>  | bi       | -   | -     | -     | SHV-11 | CTX-M-14         | -     | -   | - | - | - | - | - | - |
| L09<br>4 | <i>Klebsiella pneumoniae</i>  | ws       | 11  | IMP-8 | TEM-1 | SHV-11 | CTX-M-14         | -     | w + | + | - | + | + | + | + |





|          |                              |     |    |       |       |        |                  |       |     |   |   |   |   |   |   |
|----------|------------------------------|-----|----|-------|-------|--------|------------------|-------|-----|---|---|---|---|---|---|
| L12<br>8 | <i>Klebsiella pneumoniae</i> | bl  | 11 | KPC-2 | TEM-1 | SHV-11 | CTX-M-14         | DHA-1 | +   | + | + | + | + | + | + |
| L12<br>9 | <i>Klebsiella pneumoniae</i> | ur  | 11 | KPC-2 | -     | SHV-11 | CTX-M-14         | -     | +   | + | - | + | + | + | + |
| L13<br>0 | <i>Klebsiella pneumoniae</i> | bl  | 11 | KPC-2 | -     | SHV-11 | CTX-M-14         | -     | +   | + | - | + | + | + | + |
| L13<br>1 | <i>Klebsiella pneumoniae</i> | CSF | 11 | KPC-2 | TEM-1 | SHV-11 | CTX-M-14         | -     | +   | + | - | + | + | + | + |
| L13<br>2 | <i>Klebsiella pneumoniae</i> | bi  | 11 | KPC-2 | TEM-1 | SHV-11 | CTX-M-14         | -     | +   | + | - | + | + | + | + |
| L13<br>3 | <i>Klebsiella pneumoniae</i> | bl  | 11 | KPC-2 | TEM-1 | SHV-11 | CTX-M-14         | -     | +   | + | - | + | + | + | + |
| L13<br>4 | <i>Klebsiella pneumoniae</i> | df  | 11 | KPC-2 | -     | SHV-11 | CTX-M-14         | -     | +   | + | - | + | + | + | + |
| L13<br>5 | <i>Klebsiella pneumoniae</i> | ur  | 11 | KPC-2 | -     | SHV-11 | CTX-M-14         | -     | +   | + | + | + | + | + | + |
| L13<br>6 | <i>Klebsiella pneumoniae</i> | bl  | 11 | KPC-2 | -     | SHV-11 | CTX-M-14         | -     | +   | + | + | + | + | + | + |
| L13<br>7 | <i>Enterobacter cloacae</i>  | ur  | 93 | KPC-2 | TEM-1 | -      | CTX-M-3,CTX-M-14 | -     | +   | + | - | + | + | + | + |
| L13<br>8 | <i>Klebsiella pneumoniae</i> | bl  | 11 | KPC-2 | -     | SHV-11 | CTX-M-14         | -     | +   | + | - | + | + | + | + |
| L13<br>9 | <i>Klebsiella pneumoniae</i> | ur  | 11 | KPC-2 | -     | SHV-11 | CTX-M-14         | -     | +   | + | - | + | + | + | + |
| L14<br>0 | <i>Enterobacter cloacae</i>  | ur  | -  | -     | TEM-1 | -      | CTX-M-14         | -     | -   | - | - | - | - | - | - |
| L14<br>1 | <i>Klebsiella pneumoniae</i> | af  | 11 | KPC-2 | TEM-1 | SHV-11 | CTX-M-14         | -     | +   | + | - | + | + | + | + |
| L14<br>2 | <i>Klebsiella pneumoniae</i> | ur  | 11 | KPC-2 | -     | SHV-11 | CTX-M-14         | -     | w + | + | - | + | + | + | + |



|          |                              |    |          |              |       |        |                  |       |     |   |   |   |   |   |   |
|----------|------------------------------|----|----------|--------------|-------|--------|------------------|-------|-----|---|---|---|---|---|---|
| L14<br>3 | <i>Klebsiella pneumoniae</i> | bl | 494      | KPC-2        | -     | SHV-11 | CTX-M-3          | -     | w + | + | + | + | + | + | + |
| L14<br>4 | <i>Klebsiella pneumoniae</i> | ur | 11       | KPC-2        | -     | SHV-11 | CTX-M-14         | -     | +   | + | + | + | + | + | + |
| L14<br>5 | <i>Klebsiella pneumoniae</i> | df | 11       | KPC-2        | TEM-1 | SHV-11 | -                | -     | +   | + | - | + | + | + | + |
| L14<br>6 | <i>Klebsiella pneumoniae</i> | bl | 11       | KPC-2        | -     | SHV-11 | -                | -     | +   | + | + | + | + | + | + |
| L14<br>7 | <i>Enterobacter cloacae</i>  | bl | -        | KPC-2        | -     | -      | CTX-M-14         | DHA-1 | +   | + | + | + | + | + | + |
| L14<br>8 | <i>Enterobacter cloacae</i>  | bl | -        | KPC-2        | -     | -      | CTX-M-14         | DHA-1 | +   | + | + | + | + | + | + |
| L14<br>9 | <i>Klebsiella pneumoniae</i> | df | 11       | KPC-2        | -     | SHV-11 | CTX-M-14         | -     | +   | + | - | + | + | + | + |
| L15<br>0 | <i>Klebsiella oxytoca</i>    | df | -        | KPC-2, IMP-4 | -     | SHV-11 | -                | -     | +   | + | + | + | + | + | + |
| L15<br>1 | <i>Escherichia coli</i>      | df | 123<br>7 | NDM-1        | -     | -      | -                | -     | -   | + | + | + | + | + | + |
| L15<br>2 | <i>Klebsiella pneumoniae</i> | ti | 11       | KPC-2        | TEM-1 | SHV-11 | CTX-M-14         | -     | +   | + | - | + | + | + | + |
| L15<br>3 | <i>Escherichia coli</i>      | bl | 361      | NDM-1        | -     | -      | CTX-M-3          | -     | -   | + | + | + | + | + | + |
| L15<br>4 | <i>Klebsiella pneumoniae</i> | ur | 11       | KPC-2        | TEM-1 | SHV-11 | CTX-M-3,CTX-M-14 | -     | +   | + | + | + | + | + | + |
| L15<br>5 | <i>Klebsiella pneumoniae</i> | af | 11       | KPC-2        | TEM-1 | SHV-11 | CTX-M-3,CTX-M-14 | -     | +   | + | - | + | + | + | + |
| L15<br>6 | <i>Klebsiella pneumoniae</i> | bl | 11       | KPC-2        | TEM-1 | SHV-11 | CTX-M-3,CTX-M-14 | -     | +   | + | - | + | + | + | + |
| L15<br>8 | <i>Klebsiella pneumoniae</i> | df | 11       | KPC-2        | TEM-1 | SHV-11 | CTX-M-3          | -     | +   | + | + | + | + | + | + |

|     |                              |    |     |       |       |        |                  |       |   |   |   |   |   |   |   |
|-----|------------------------------|----|-----|-------|-------|--------|------------------|-------|---|---|---|---|---|---|---|
| L15 | <i>Klebsiella pneumoniae</i> | bi | 11  | KPC-2 | TEM-1 | SHV-11 | CTX-M-14         | -     | + | + | - | + | + | + | + |
| L16 | <i>Klebsiella pneumoniae</i> | sp | 11  | KPC-2 | TEM-1 | SHV-11 | CTX-M-14         | -     | + | + | + | + | + | + | + |
| L16 | <i>Klebsiella pneumoniae</i> | ur | 11  | KPC-2 | TEM-1 | SHV-11 | CTX-M-14         | -     | + | + | + | + | + | + | + |
| R01 | <i>Klebsiella pneumoniae</i> | af | -   | -     | -     | SHV-11 | CTX-M-14         | DHA-1 | - | - | - | - | - | - | - |
| R02 | <i>Enterobacter cloacae</i>  | af | -   | -     | -     | -      | CTX-M-14         | -     | - | - | - | - | - | - | - |
| R03 | <i>Escherichia coli</i>      | af | -   | -     | -     | -      | CTX-M-14         | -     | - | - | - | - | - | - | - |
| R04 | <i>Escherichia coli</i>      | af | -   | -     | TEM-1 | -      | CTX-M-3          | -     | - | - | - | - | - | - | - |
| R05 | <i>Escherichia coli</i>      | af | -   | -     | -     | -      | CTX-M-15         | -     | - | - | - | - | - | - | - |
| R06 | <i>Escherichia coli</i>      | af | -   | -     | -     | -      | CTX-M-55         | -     | - | - | - | - | - | - | - |
| R07 | <i>Klebsiella pneumoniae</i> | af | 11  | KPC-2 | -     | SHV-11 | CTX-M-14         | -     | + | + | + | + | + | + | + |
| R08 | <i>Klebsiella pneumoniae</i> | af | 11  | KPC-2 | -     | -      | CTX-M-14         | -     | + | + | + | + | + | + | + |
| R09 | <i>Klebsiella pneumoniae</i> | af | -   | -     | -     | -      | -                | -     | - | - | - | - | - | - | - |
| R10 | <i>Klebsiella pneumoniae</i> | af | 11  | KPC-2 | -     | SHV-11 | CTX-M-14         | -     | + | + | + | + | + | + | + |
| R11 | <i>Escherichia coli</i>      | af | -   | -     | TEM-1 | -      | CTX-M-55         | -     | - | - | - | - | - | - | - |
| R12 | <i>Klebsiella pneumoniae</i> | af | 11  | KPC-2 | -     | SHV-11 | CTX-M-3,CTX-M-14 | -     | + | + | - | + | + | + | + |
| R13 | <i>Escherichia coli</i>      | af | 354 | KPC-2 | -     | -      | CTX-M-14         | -     | + | + | + | + | + | + | + |

|     |                               |    |    |       |       |        |                   |       |     |   |   |   |   |   |
|-----|-------------------------------|----|----|-------|-------|--------|-------------------|-------|-----|---|---|---|---|---|
| R14 | <i>Klebsiella pneumoniae</i>  | af | -  | -     | -     | SHV-11 | CTX-M-14          | -     | -   | - | - | - | - | - |
| R15 | <i>Klebsiella pneumoniae</i>  | af | 11 | KPC-2 | -     | SHV-11 | CTX-M-14          | -     | +   | + | + | + | + | + |
| R16 | <i>Klebsiella pneumoniae</i>  | af | -  | -     | -     | SHV-12 | -                 | DHA-1 | -   | - | - | - | - | - |
| R17 | <i>Enterobacter cloacae</i>   | af | -  | -     | -     | -      | CTX-M-14          | -     | -   | - | - | - | - | - |
| R19 | <i>Enterobacter cloacae</i>   | af | -  | IMP-4 | -     | -      | -                 | -     | +   | + | + | + | + | + |
| R22 | <i>Klebsiella pneumoniae</i>  | af | -  | -     | -     | SHV-11 | -                 | DHA-1 | -   | - | - | - | - | - |
| R23 | <i>Klebsiella pneumoniae</i>  | af | 11 | KPC-2 | -     | SHV-11 | -                 | -     | +   | + | + | + | + | + |
| R25 | <i>Enterobacter aerogenes</i> | sp | -  | KPC-2 | TEM-1 | SHV-11 | CTX-M-14          | DHA-1 | +   | + | + | + | + | + |
| R26 | <i>Enterobacter cloacae</i>   | bl | -  | -     | TEM-1 | SHV-12 | -                 | -     | -   | - | - | - | - | - |
| R27 | <i>Enterobacter cloacae</i>   | af | -  | -     | TEM-1 | -      | -                 | -     | w + | - | - | - | - | - |
| R28 | <i>Enterobacter cloacae</i>   | ur | -  | -     | TEM-1 | -      | CTX-M-14          | -     | -   | - | - | - | - | - |
| R30 | <i>Enterobacter cloacae</i>   | ur | -  | IMP-1 | TEM-1 | -      | -                 | -     | w + | + | + | + | + | + |
| R31 | <i>Enterobacter cloacae</i>   | ur | -  | -     | -     | -      | -                 | -     | -   | - | - | - | - | - |
| R34 | <i>Enterobacter cloacae</i>   | af | -  | IMP-4 | TEM-1 | -      | CTX-M-22 CTX-M-14 | DHA-1 | +   | + | + | + | + | + |
| R35 | <i>Klebsiella pneumoniae</i>  | af | -  | -     | -     | SHV-11 | CTX-M-55          | CMY-2 | w + | - | - | - | - | - |

|      |                               |    |    |       |       |        |                  |       |     |   |   |   |   |   |
|------|-------------------------------|----|----|-------|-------|--------|------------------|-------|-----|---|---|---|---|---|
| R37  | <i>Klebsiella pneumoniae</i>  | af | 1  | KPC-2 | -     | SHV-11 | CTX-M-15         | -     | +   | + | + | + | + | + |
| R38  | <i>Klebsiella pneumoniae</i>  | ur | 11 | KPC-2 | -     | SHV-11 | CTX-M-14         | -     | +   | + | + | + | + | - |
| R39  | <i>Klebsiella pneumoniae</i>  | ur | 11 | KPC-2 | -     | SHV-11 | CTX-M-14         | -     | +   | + | + | + | + | - |
| R40  | <i>Klebsiella pneumoniae</i>  | af | 11 | KPC-2 | -     | SHV-11 | CTX-M-3,CTX-M-14 | -     | +   | + | + | + | + | + |
| R41  | <i>Klebsiella pneumoniae</i>  | af | 11 | KPC-2 | -     | SHV-11 | CTX-M-14         | -     | w + | + | + | + | + | + |
| Y001 | <i>Klebsiella pneumoniae</i>  | sp | -  | -     | -     | SHV-11 | -                | DHA-1 | -   | - | - | - | - | - |
| Y003 | <i>Klebsiella pneumoniae</i>  | sp | -  | -     | -     | -      | -                | DHA-1 | -   | - | - | - | - | - |
| Y004 | <i>Klebsiella pneumoniae</i>  | sp | -  | -     | -     | SHV-1  | -                | DHA-1 | -   | - | - | - | - | - |
| Y005 | <i>Klebsiella pneumoniae</i>  | df | -  | -     | -     | SHV-12 | -                | DHA-1 | -   | - | - | - | - | - |
| Y008 | <i>Klebsiella pneumoniae</i>  | df | -  | -     | -     | SHV-11 | -                | DHA-1 | -   | - | - | - | - | - |
| Y018 | <i>Klebsiella pneumoniae</i>  | ti | 1  | KPC-2 | -     | SHV28  | -                | DHA-1 | w + | + | + | + | + | + |
| Y024 | <i>Enterobacter cloacae</i>   | ur | -  | -     | TEM-1 | -      | -                | DHA-1 | w + | - | - | - | - | - |
| Y041 | <i>Enterobacter aerogenes</i> | ur | -  | -     | -     | -      | CTX-M-14         | DHA-1 | w + | - | - | - | - | - |
| Y043 | <i>Escherichia coli</i>       | vs | -  | -     | TEM-1 | -      | CTX-M-14         | -     | -   | - | - | - | - | - |
| Y047 | <i>Klebsiella pneumoniae</i>  | bl | 17 | IMP-8 | TEM-1 | SHV-11 | CTX-M-14         | -     | +   | + | + | + | + | + |

|          |                              |     |    |       |       |        |                  |       |     |   |   |   |   |   |   |
|----------|------------------------------|-----|----|-------|-------|--------|------------------|-------|-----|---|---|---|---|---|---|
| Y04<br>9 | <i>Klebsiella pneumoniae</i> | ur  | 17 | IMP-8 | TEM-1 | SHV-11 | CTX-M-14         | -     | +   | + | + | + | + | + | + |
| Y05<br>6 | <i>Enterobacter cloacae</i>  | bl  | -  | -     | -     | -      | -                | -     | -   | - | - | - | - | - | - |
| Y06<br>0 | <i>Escherichia coli</i>      | sp  | -  | -     | TEM-1 | -      | -                | CMY-2 | w + | - | - | - | - | + | - |
| Y06<br>1 | <i>Klebsiella pneumoniae</i> | sp  | -  | -     | TEM-1 | SHV-1a | -                | CMY-2 | -   | - | - | - | - | - | - |
| Y06<br>2 | <i>Citrobacter freundii</i>  | ur  | -  | IMP-4 | TEM-1 | -      | -                | CMY-2 | +   | + | + | + | + | + | + |
| Y06<br>3 | <i>Citrobacter freundii</i>  | CSF | -  | IMP-4 | -     | -      | -                | -     | +   | + | + | + | + | + | + |
| Y06<br>4 | <i>Klebsiella oxytoca</i>    | sp  | -  | IMP-4 | -     | -      | -                | -     | +   | + | + | + | + | + | + |
| Y06<br>6 | <i>Klebsiella pneumoniae</i> | ws  | -  | -     | -     | SHV-11 | -                | DHA-1 | -   | - | - | - | - | - | - |
| Y06<br>7 | <i>Klebsiella pneumoniae</i> | sp  | -  | -     | -     | SHV-2  | CTX-M-14         | DHA-1 | w + | - | - | - | - | - | - |
| Y06<br>8 | <i>Klebsiella pneumoniae</i> | sp  | -  | -     | -     | -      | CTX-M-15         | -     | -   | - | - | - | - | - | - |
| Y06<br>9 | <i>Klebsiella pneumoniae</i> | sp  | -  | -     | -     | SHV-28 | -                | -     | -   | - | - | - | - | - | - |
| Y07<br>0 | <i>Klebsiella pneumoniae</i> | sp  | 23 | KPC-2 | -     | SHV-11 | CTX-M-14         | -     | +   | + | - | + | + | + | + |
| Y07<br>1 | <i>Klebsiella pneumoniae</i> | ws  | 23 | KPC-2 | TEM-1 | SHV-11 | CTX-M-14         | -     | +   | + | + | + | + | + | + |
| Y07<br>4 | <i>Escherichia coli</i>      | sp  | -  | -     | TEM-1 | -      | CTX-M-3,CTX-M-14 | -     | -   | - | - | - | - | - | - |
| Y07<br>5 | <i>Klebsiella pneumoniae</i> | ur  | -  | -     | -     | SHV-11 | -                | DHA-1 | -   | - | - | - | - | - | - |

|          |                               |    |     |       |       |        |          |       |     |   |   |   |   |   |
|----------|-------------------------------|----|-----|-------|-------|--------|----------|-------|-----|---|---|---|---|---|
| Y07<br>6 | <i>Klebsiella pneumoniae</i>  | bl | 416 | IMP-4 | TEM-1 | SHV-14 | CTX-M-3  | -     | +   | + | + | + | + | + |
| Y07<br>7 | <i>Klebsiella pneumoniae</i>  | sp | 416 | IMP-4 | TEM-1 | SHV-14 | CTX-M-3  | -     | +   | + | + | + | + | + |
| Y07<br>8 | <i>Citrobacter freundii</i>   | bl | -   | -     | -     | -      | -        | CMY-2 | w + | - | - | - | - | - |
| Y08<br>1 | <i>Klebsiella pneumoniae</i>  | bl | -   | -     | TEM-1 | SHV-12 | -        | DHA-1 | w + | - | - | - | - | - |
| Y08<br>3 | <i>Klebsiella pneumoniae</i>  | sp | -   | -     | -     | SHV-11 | CTX-M-14 | -     | -   | - | - | - | - | - |
| Y08<br>4 | <i>Klebsiella pneumoniae</i>  | bl | -   | -     | -     | SHV-11 | -        | -     | -   | - | - | - | - | - |
| Y08<br>5 | <i>Enterobacter aerogenes</i> | vs | -   | -     | TEM-1 | -      | CTX-M-3  | -     | -   | - | - | - | - | - |
| Y08<br>6 | <i>Escherichia coli</i>       | ur | 648 | KPC-2 | TEM-1 | -      | -        | -     | +   | + | + | + | + | + |
| Y08<br>7 | <i>Escherichia coli</i>       | af | 648 | KPC-2 | TEM-1 | -      | -        | -     | +   | + | + | + | + | + |
| Y08<br>8 | <i>Enterobacter cloacae</i>   | bl | -   | -     | -     | -      | CTX-M-14 | -     | -   | - | - | - | - | - |
| Y08<br>9 | <i>Enterobacter cloacae</i>   | bl | -   | -     | -     | -      | CTX-M-14 | -     | -   | - | - | - | - | - |
| Y09<br>0 | <i>Enterobacter cloacae</i>   | bl | -   | -     | -     | -      | CTX-M-14 | -     | -   | - | - | - | - | - |
| Y09<br>1 | <i>Enterobacter cloacae</i>   | sp | -   | -     | -     | -      | CTX-M-14 | -     | -   | - | - | - | - | - |
| Y09<br>2 | <i>Enterobacter cloacae</i>   | bl | -   | IMP-4 | TEM-1 | -      | CTX-M-14 | DHA-1 | +   | + | + | + | + | + |
| Y09<br>4 | <i>Enterobacter cloacae</i>   | df | -   | IMP-4 | TEM-1 | -      | CTX-M-3  | -     | +   | + | + | + | + | + |
| Y09<br>6 | <i>Escherichia coli</i>       | df | -   | -     | TEM-1 | -      | CTX-M-14 | CMY-2 | w + | - | - | - | - | - |

|          |                              |    |    |       |       |        |          |       |    |   |   |   |   |   |   |
|----------|------------------------------|----|----|-------|-------|--------|----------|-------|----|---|---|---|---|---|---|
| Y09<br>7 | <i>Klebsiella pneumoniae</i> | bl | 11 | IMP-4 | -     | SHV-33 | -        | -     | -  | + | + | + | + | + | + |
| Y09<br>9 | <i>Klebsiella pneumoniae</i> | sp | 15 | KPC-2 | -     | -      | CTX-M-3  | -     | w+ | + | + | + | + | + | + |
| Y10<br>1 | <i>Escherichia coli</i>      | bl | -  | -     | TEM-1 | -      | CTX-M-14 | CMY-2 | -  | - | - | - | - | - | - |
| Y10<br>2 | <i>Escherichia coli</i>      | bl | -  | -     | TEM-1 | -      | CTX-M-14 | CMY-2 | -  | - | - | - | - | + | - |
| Y10<br>3 | <i>Enterobacter cloacae</i>  | bl | -  | IMP-4 | TEM-1 | -      | CTX-M-3  | -     | +  | + | + | + | + | + | + |
| Y10<br>4 | <i>Klebsiella pneumoniae</i> | bl | -  | -     | TEM-1 | SHV-11 | CTX-M-15 | -     | -  | - | - | - | - | - | - |
| Y10<br>5 | <i>Klebsiella pneumoniae</i> | sp | -  | -     | TEM-1 | SHV-12 | CTX-M-14 | DHA-1 | -  | - | - | - | - | - | - |

Spe: specimen, ab: abscess, af: ascitic fluid, bi: bile, bl: blood, BALF: bronchoalveolar lavage fluid, ca: catheter, CSF: cerebrospinal fluid, df: drainage fluid, fe: fecal, gf: gastric fluid, ot: other, pe: pleural effusion, rs: rectal swab, sf: secretion fluid, sp: sputum, ti: tissue, ur: urine, vs: vaginal swab, ws: wound swab,

ST: sequence type, MHT: modified Hodge test, MHA: meropenem hydrolysis assay, mCIM: modified carbapenem inactivation method, MEM: meropenem, IPM: imipenem, ETP: ertapenem

w+: Results that were interpreted as weak positive and were classified as positive for analysis.
